# Supplementary figures and images for: Evaluating heterogeneity in cumulative meta-analyses
Source: Springer Nature journal article supplement (doi:10.1186/1471-2288-4-18), 2004-07-13

Figure A2-1. Nicotine replacement therapy: patch.

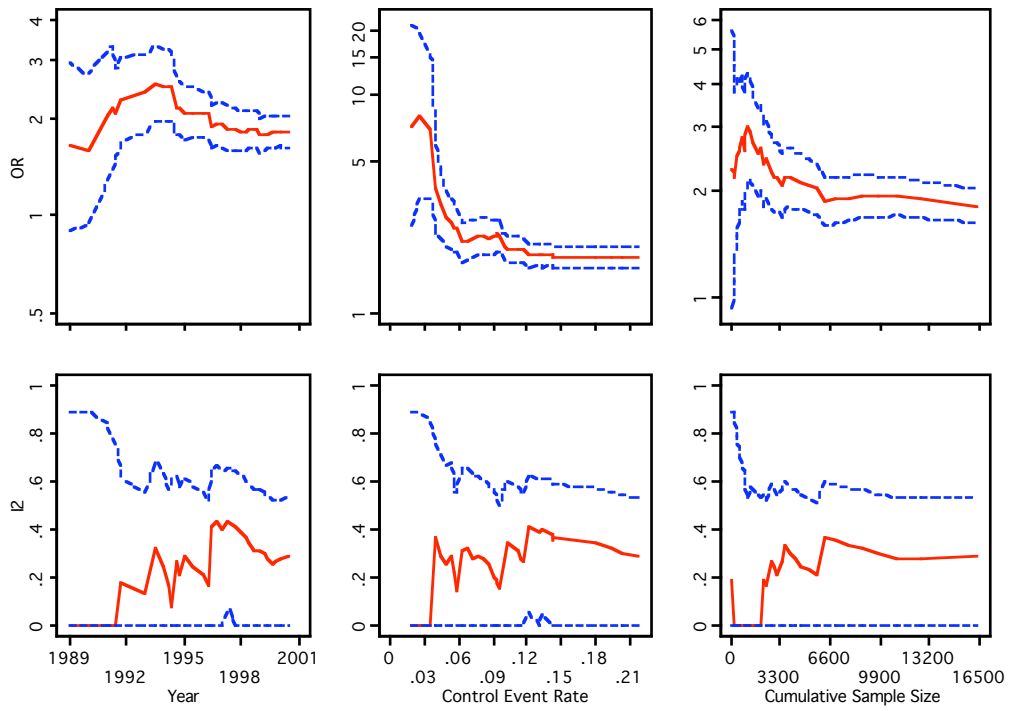

Figure A2-2. Physician advice.

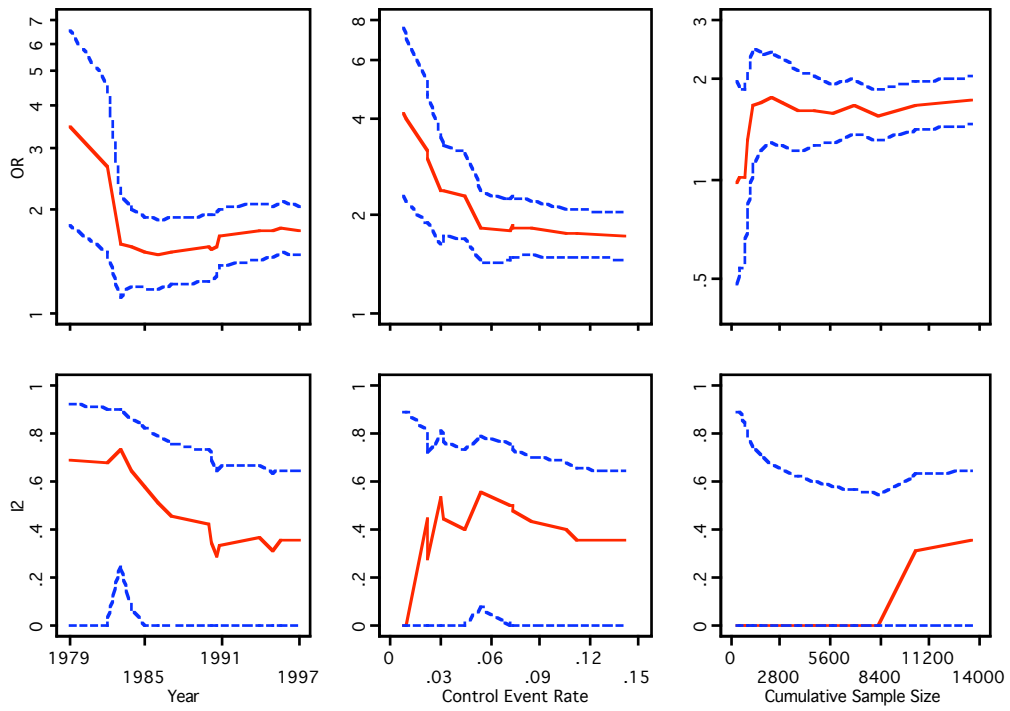

Figure A2-3. Acupuncture.

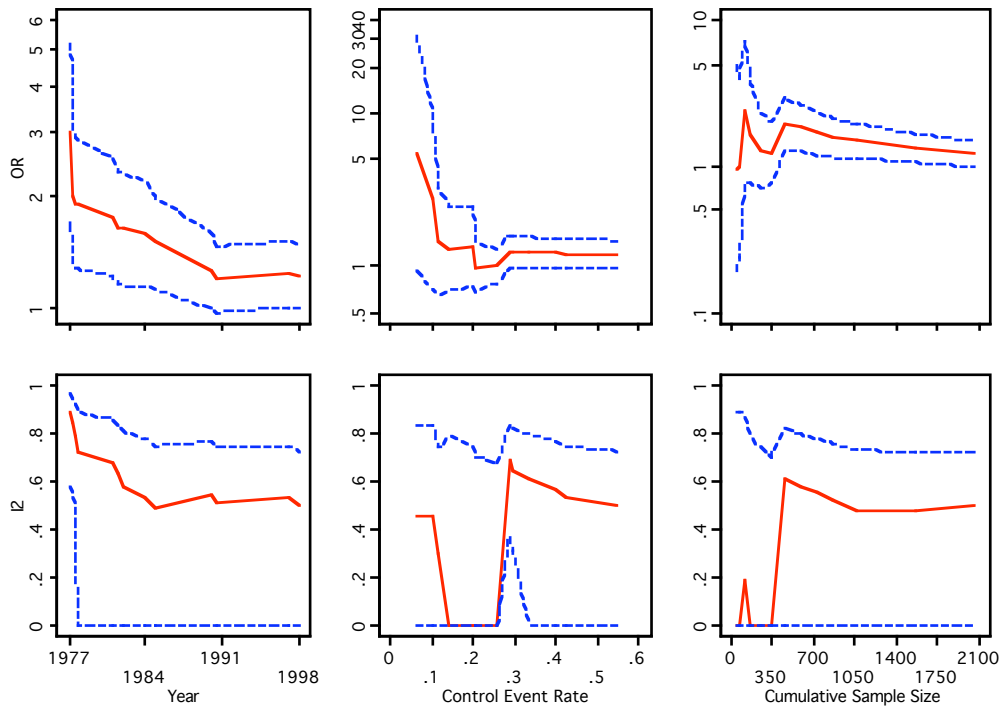

Supplement: Additional file 1 [file 1471-2288-4-18-s1.pdf]
